# Supplementary material
Source: PubMed Central journal article supplement (PMC3694711)
Supplement: supp_tpc.113.112151_tpc112151Supplemental.pdf [file supp_tpc.113.112151_tpc112151Supplemental.pdf]

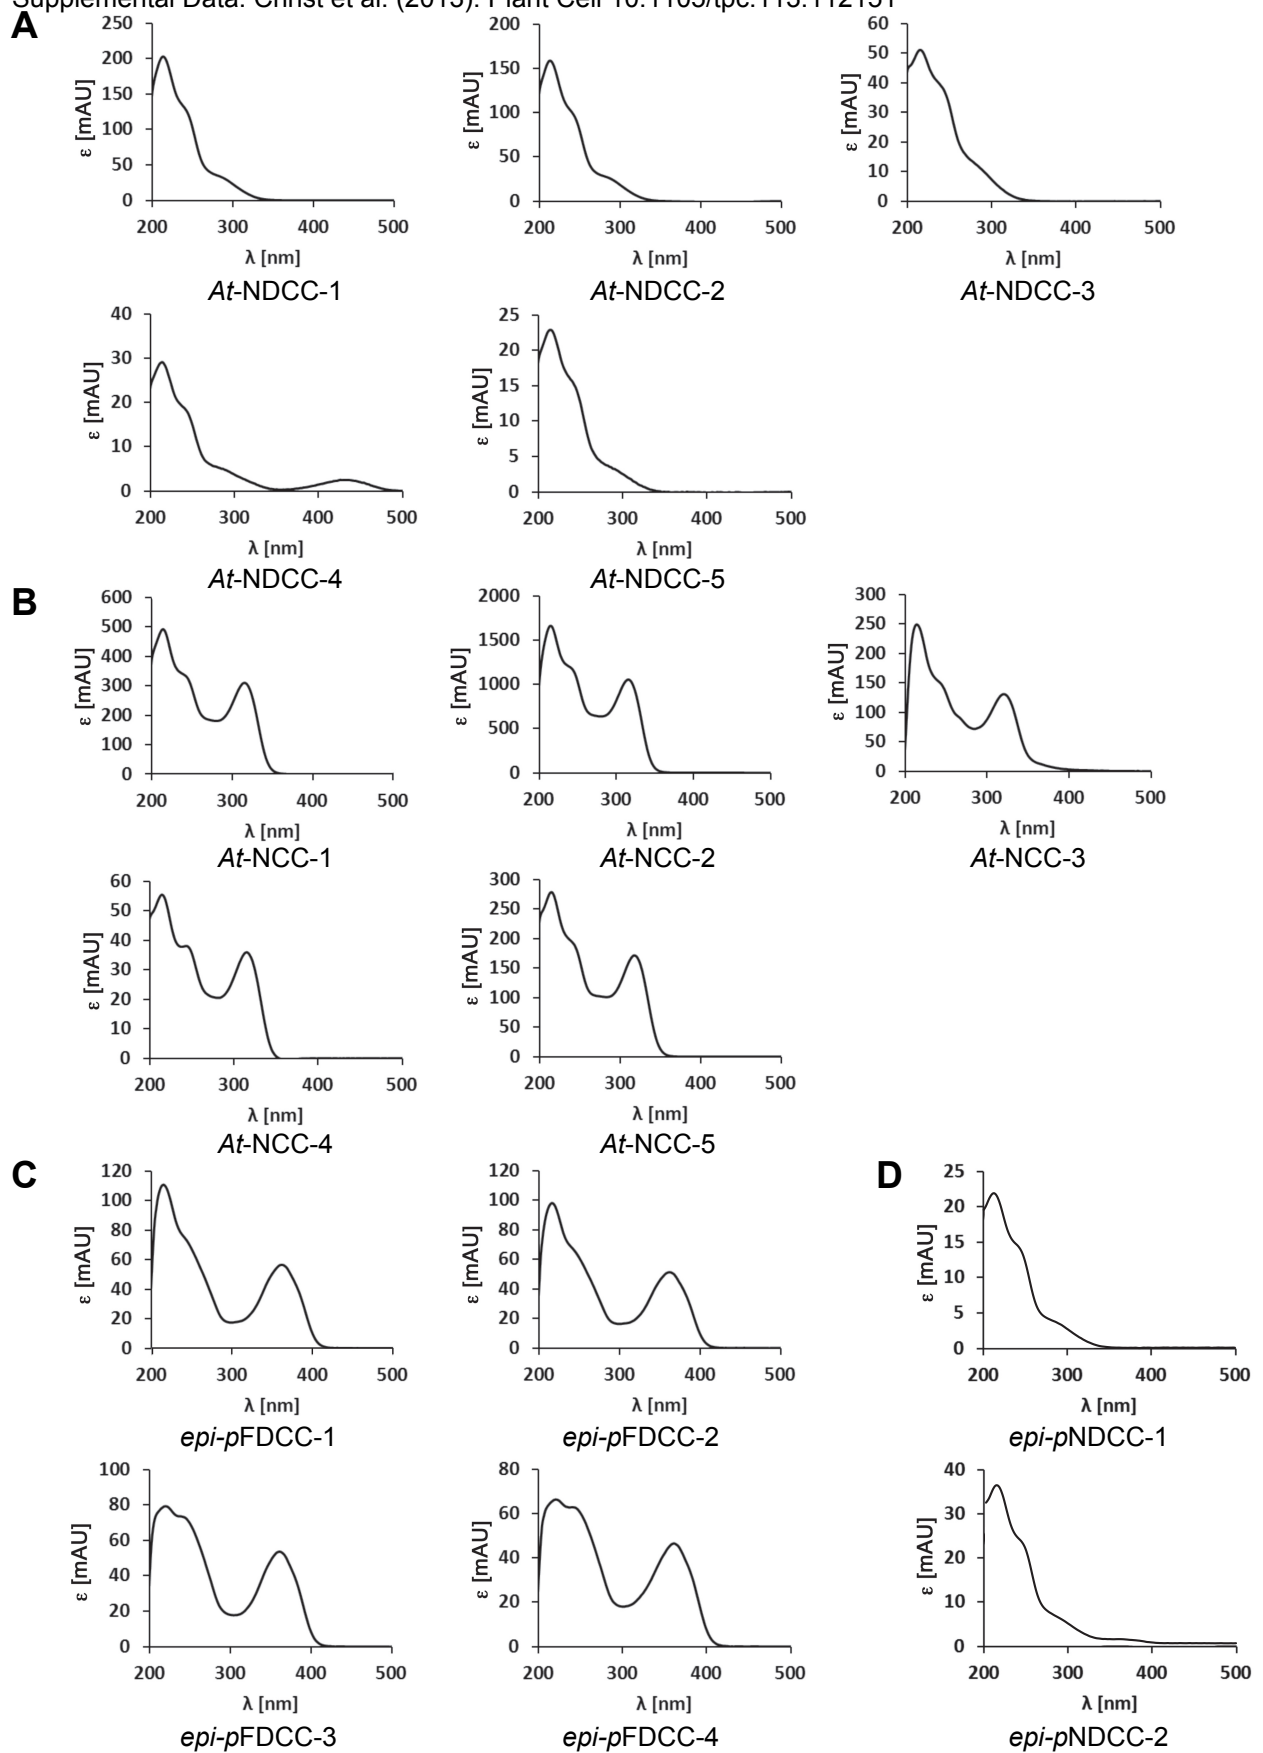

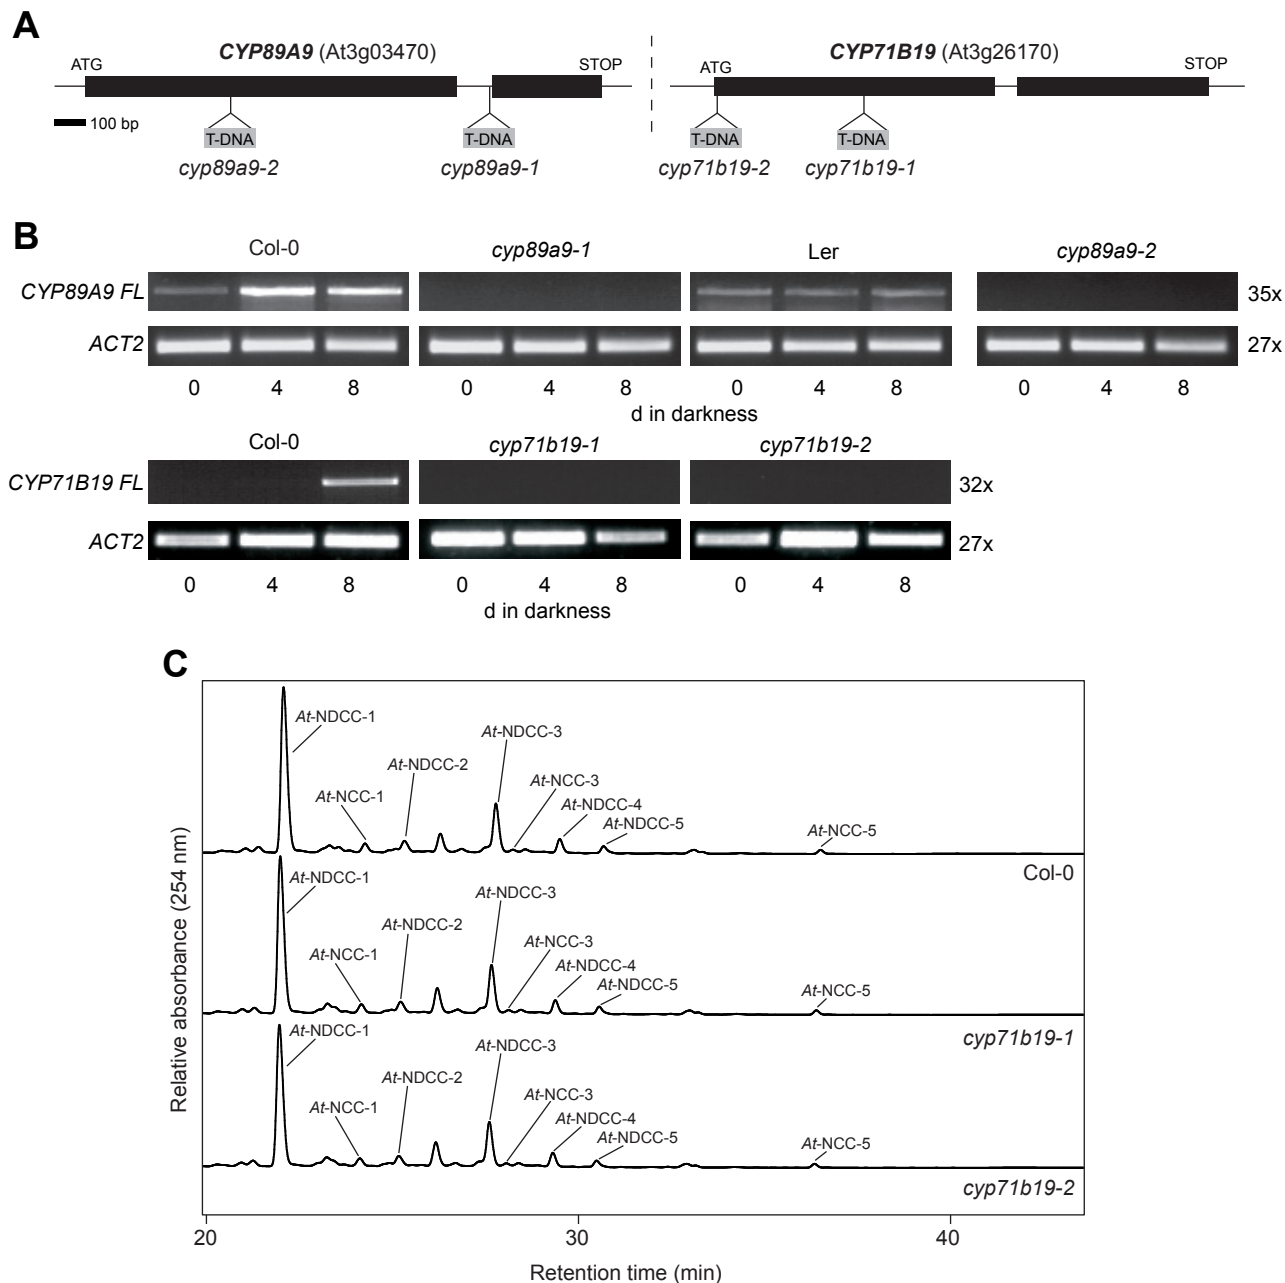

**Supplemental Figure 2.** Analysis of Gene Expression in *cyp89a9* and *cyp71b19* Mutants and Colorless Chl Catabolites of *cyp71b19* Mutants.

**(A)** Gene structures of *CYP89A9* and *CYP71B19* showing the T-DNA insertion sites of the different mutants studied in this work.

**(B)** Analysis of gene expression during dark-induced senescence in *cyp89a9-1*, *cyp89a9-2*, *cyp71b19-1* and *cyp71b19-2*. Levels of *ACTIN2* (*ACT2*) gene expression were used as control. Expression was analyzed with nonsaturating numbers of PCR cycles as shown at the right. PCR products were separated on agarose gels and visualized with ethidium bromide.

**(C)** Colorless catabolites of dark-incubated (8 d) leaves of Col-0 and *cyp71b19* mutants were separated by HPLC.  $A_{254}$  is shown. For clarity, only the relevant part of the HPLC traces is shown.

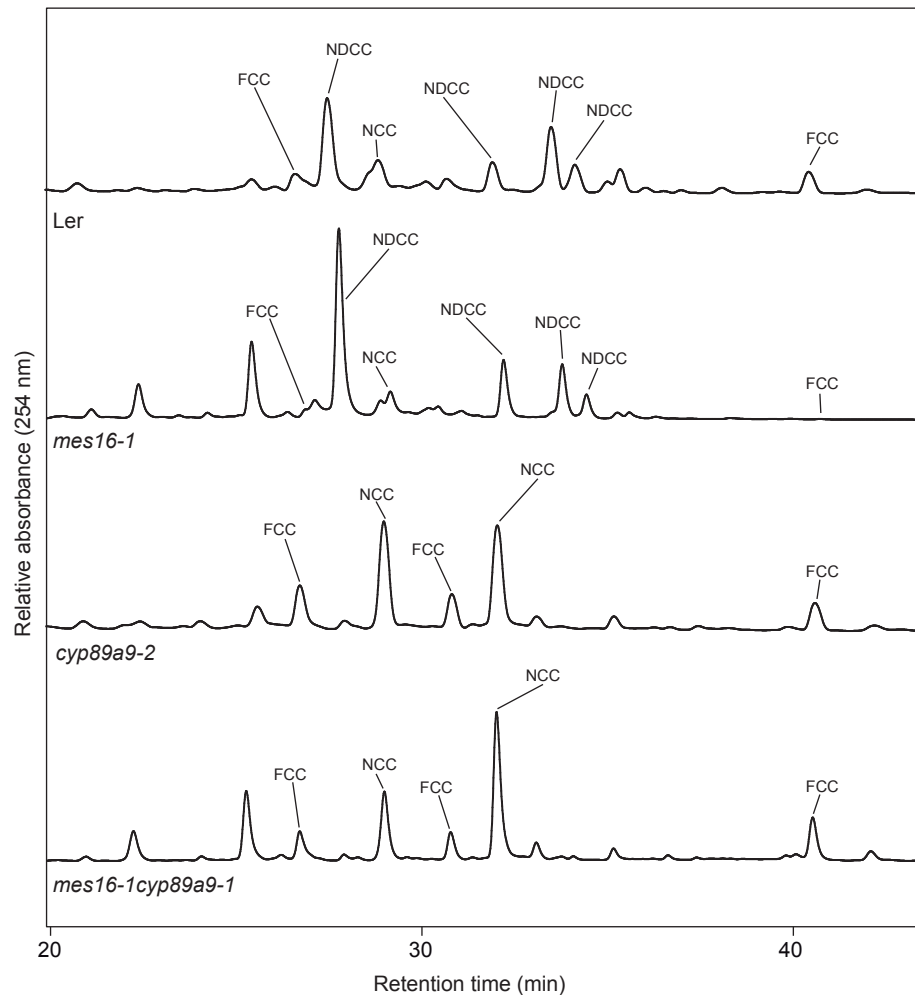

**Supplemental Figure 3.** Analysis of the *cyp89a9-2* Mutant in the Ler Background, a Natural *mes16* Mutant.

Colorless catabolites accumulating in dark-incubated (8 d) leaves of Ler, *mes16-1*, *cyp89a9-2* and *mes16-1cyp89a9-1* were separated by HPLC.  $A_{254}$  is shown. For clarity, only the relevant part of the HPLC traces is shown. Note that because of the absence of MES16, catabolite patterns are different from patterns in Col-0 (Christ et al., 2012). The catabolites in this figure were solely identified by their respective spectra.

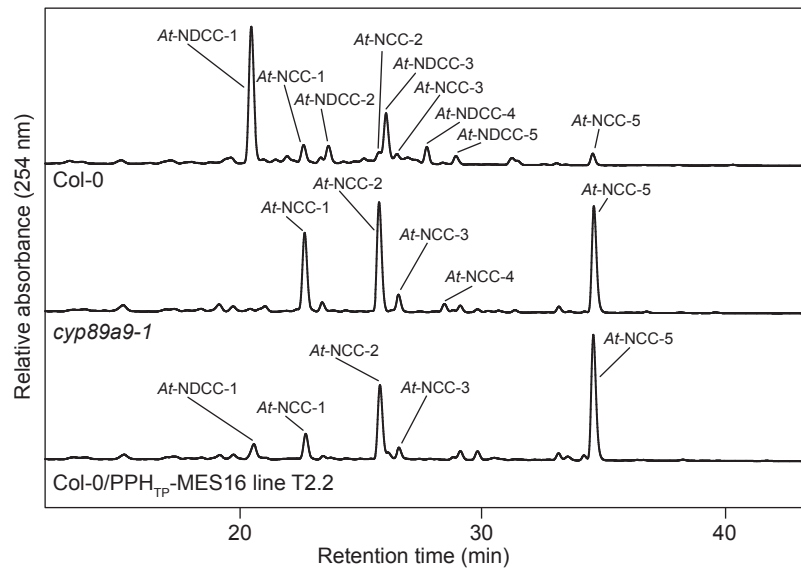

**Supplemental Figure 4.** Colorless Catabolites Accumulating in Dark-Incubated (8 d) Leaves of Col-0, *cyp89a9-1* and Col-0/PPH<sub>TP</sub>-MES16.

Colorless catabolites were separated by HPLC.  $A_{254}$  is shown. For clarity, only the relevant part of the traces is shown.

**Supplemental Table 1.** Search for Co-Expressed Genes in Senescent Leaves, Cauline Leaves, Petals and Sepals. Expression analysis was performed using the Genes Search Tool “Anatomy” of Genevestigator (Zimmermann et al., 2004). For reference, see main paper.

| ARRAY ELEMENT | LOCUS IDENTIFIER | ANNOTATION <sup>a</sup>                                                                                                                                                                                                                                                                                                                                                                                                                                             | SCORE K <sup>b</sup> |
|---------------|------------------|---------------------------------------------------------------------------------------------------------------------------------------------------------------------------------------------------------------------------------------------------------------------------------------------------------------------------------------------------------------------------------------------------------------------------------------------------------------------|----------------------|
| 259766_at     | At1g64360        | unknown protein; Has 6 Blast hits to 6 proteins in 2 species: Archae - 0; Bacteria - 0; Metazoa - 0; Fungi - 0; Plants - 6; Viruses - 0; Other Eukaryotes - 0 (source: NCBI BLink).                                                                                                                                                                                                                                                                                 | 0.55                 |
| 264261_at     | At1g09240        | ATNAS3_NAS3__nicotianamine synthase 3                                                                                                                                                                                                                                                                                                                                                                                                                               | 0.48                 |
| 254189_at     | At4g24000        | ATCSLG2_CSLG2__cellulose synthase like G2                                                                                                                                                                                                                                                                                                                                                                                                                           | 0.44                 |
| 254574_at     | At4g19430        | unknown protein; FUNCTIONS IN: molecular_function unknown; INVOLVED IN: biological_process unknown; LOCATED IN: chloroplast; EXPRESSED IN: 17 plant structures; EXPRESSED DURING: 13 growth stages; Has 30201 Blast hits to 17322 proteins in 780 species: Archae - 12; Bacteria - 1396; Metazoa - 17338; Fungi - 3422; Plants - 5037; Viruses - 0; Other Eukaryotes - 2996 (source: NCBI BLink).                                                                   | 0.43                 |
| 264899_at     | At1g23130        | Polyketide cyclase/dehydrase and lipid transport superfamily protein                                                                                                                                                                                                                                                                                                                                                                                                | 0.4                  |
| 266292_at     | At2g29350        | SAG13__senescence-associated gene 13                                                                                                                                                                                                                                                                                                                                                                                                                                | 0.37                 |
| 259058_at     | At3g03470        | CYP89A9__cytochrome P450, family 87, subfamily A, polypeptide 9                                                                                                                                                                                                                                                                                                                                                                                                     | 0.33                 |
| 254174_at     | At4g24120        | ATYSL1_YSL1__YELLOW STRIPE like 1                                                                                                                                                                                                                                                                                                                                                                                                                                   | 0.32                 |
| 256300_at     | At1g69490        | ANAC029_ATNAP_NAP__NAC-like, activated by AP3/PI                                                                                                                                                                                                                                                                                                                                                                                                                    | 0.3                  |
| 254564_at     | At4g19170        | CCD4_NCED4__nine-cis-epoxycarotenoid dioxygenase 4                                                                                                                                                                                                                                                                                                                                                                                                                  | 0.3                  |
| 249850_at     | At5g23240        | DNAJ heat shock N-terminal domain-containing protein                                                                                                                                                                                                                                                                                                                                                                                                                | 0.29                 |
| 255630_at     | At4g00700        | C2 calcium/lipid-binding plant phosphoribosyltransferase family protein                                                                                                                                                                                                                                                                                                                                                                                             | 0.28                 |
| 255626_at     | At4g00780        | TRAF-like family protein                                                                                                                                                                                                                                                                                                                                                                                                                                            | 0.28                 |
| 265913_at     | At2g25625        | unknown protein; FUNCTIONS IN: molecular_function unknown; INVOLVED IN: biological_process unknown; LOCATED IN: chloroplast; EXPRESSED IN: 10 plant structures; EXPRESSED DURING: LP.06 six leaves visible, LP.04 four leaves visible, 4 anthesis, petal differentiation and expansion stage; Has 24 Blast hits to 24 proteins in 9 species: Archae - 0; Bacteria - 0; Metazoa - 0; Fungi - 0; Plants - 24; Viruses - 0; Other Eukaryotes - 0 (source: NCBI BLink). | 0.27                 |
| 254153_at     | At4g24450        | ATGWD2_GWD3_PWD__phosphoglucan, water dikinase                                                                                                                                                                                                                                                                                                                                                                                                                      | 0.26                 |
| 250435_at     | At5g10380        | ATRING1_RING1__RING/U-box superfamily protein                                                                                                                                                                                                                                                                                                                                                                                                                       | 0.26                 |
| 249996_at     | At5g18600        | Thioredoxin superfamily protein                                                                                                                                                                                                                                                                                                                                                                                                                                     | 0.26                 |
| 249454_at     | At5g39520        | Protein of unknown function (DUF1997)                                                                                                                                                                                                                                                                                                                                                                                                                               | 0.26                 |
| 262281_at     | At1g68570        | Major facilitator superfamily protein                                                                                                                                                                                                                                                                                                                                                                                                                               | 0.25                 |
| 266078_at     | At2g40670        | ARR16_RR16__response regulator 16                                                                                                                                                                                                                                                                                                                                                                                                                                   | 0.24                 |
| 250259_at     | At5g13800        | CRN1_PPH__pheophytinase                                                                                                                                                                                                                                                                                                                                                                                                                                             | 0.24                 |
| 259765_at     | At1g64370        | unknown protein; Has 773 Blast hits to 375 proteins in 118 species: Archae - 0; Bacteria - 97; Metazoa - 421; Fungi - 108; Plants - 31; Viruses - 0; Other Eukaryotes - 116 (source: NCBI BLink).                                                                                                                                                                                                                                                                   | 0.23                 |
| 254305_at     | At4g22200        | AKT2_AKT2/3_AKT3_KT2/3__potassium transport 2/3                                                                                                                                                                                                                                                                                                                                                                                                                     | 0.23                 |

|             |                        |                                                                                                                                                                                                                |      |
|-------------|------------------------|----------------------------------------------------------------------------------------------------------------------------------------------------------------------------------------------------------------|------|
| 247800_at   | At5g58570              | unknown protein; Has 30201 Blast hits to 17322 proteins in 780 species: Archae - 12; Bacteria - 1396; Metazoa - 17338; Fungi - 3422; Plants - 5037; Viruses - 0; Other Eukaryotes - 2996 (source: NCBI BLink). | 0.23 |
| 258925_at   | At3g10420              | SPD1__P-loop containing nucleoside triphosphate hydrolases superfamily protein                                                                                                                                 | 0.22 |
| 245385_at   | At4g14020              | Rapid alkalization factor (RALF) family protein                                                                                                                                                                | 0.22 |
| 253382_at   | At4g33040              | Thioredoxin superfamily protein                                                                                                                                                                                | 0.22 |
| 260155_at   | At1g52870              | Peroxisomal membrane 22 kDa (Mpv17/PMP22) family protein                                                                                                                                                       | 0.21 |
| 260410_at   | At1g69870              | NRT1.7__nitrate transporter 1.7                                                                                                                                                                                | 0.21 |
| 246302_at   | At3g51860              | ATCAX3_ATHCX1_CAX1-LIKE_CAX3__cation exchanger 3                                                                                                                                                               | 0.21 |
| 250054_at   | At5g17860              | CAX7__calcium exchanger 7                                                                                                                                                                                      | 0.21 |
| 256497_at   | At1g31580              | CXC750__ECS1                                                                                                                                                                                                   | 0.2  |
| 251360_at   | At3g61210              | S-adenosyl-L-methionine-dependent methyltransferases superfamily protein                                                                                                                                       | 0.2  |
| 245346_at   | At4g17090              | BAM3_BMY8_CT-BMY__chloroplast beta-amylase                                                                                                                                                                     | 0.2  |
| 254101_at   | At4g25000              | AMY1_ATAMY1__alpha-amylase-like                                                                                                                                                                                | 0.2  |
| 250690_at   | At5g06530              | ABCG22_AtABCG22__ABC-2 type transporter family protein                                                                                                                                                         | 0.2  |
| 264901_at   | At1g23090              | AST91_SULTR3;3__sulfate transporter 91                                                                                                                                                                         | 0.19 |
| 266572_at   | At2g23840              | HNH endonuclease                                                                                                                                                                                               | 0.19 |
| 259129_at   | At3g02150              | PTF1_TCP13_TFPD__plastid transcription factor 1                                                                                                                                                                | 0.19 |
| 254299_at   | At4g22920              | ATNYE1_NYE1__non-yellowing 1                                                                                                                                                                                   | 0.19 |
| 250446_at   | At5g10770              | Eukaryotic aspartyl protease family protein                                                                                                                                                                    | 0.19 |
| 245901_at   | At5g11060              | KNAT4__KNOTTED1-like homeobox gene 4                                                                                                                                                                           | 0.19 |
| 248566_s_at | At5g49730<br>At5g49740 | ATFRO6_FRO6_FRO6__ferric reduction oxidase 6                                                                                                                                                                   | 0.19 |
| 248153_at   | At5g54250              | ATCNGC4_CNGC4_DND2_HLM1__cyclic nucleotide-gated cation channel 4                                                                                                                                              | 0.19 |
| 260007_at   | At1g67870              | glycine-rich protein                                                                                                                                                                                           | 0.18 |
| 262232_at   | At1g68600              | Aluminium activated malate transporter family protein                                                                                                                                                          | 0.18 |
| 266938_at   | At2g18950              | ATHPT_HPT1_TPT1_VTE2__homogentisate phytyltransferase 1                                                                                                                                                        | 0.18 |
| 266291_at   | At2g29320              | NAD(P)-binding Rossmann-fold superfamily protein                                                                                                                                                               | 0.18 |
| 255795_at   | At2g33380              | AtCLO3_CLO-3_CLO3_RD20__Caleosin-related family protein                                                                                                                                                        | 0.18 |
| 267076_at   | At2g41090              | Calcium-binding EF-hand family protein                                                                                                                                                                         | 0.18 |
| 263497_at   | At2g42540              | COR15_COR15A__cold-regulated 15a                                                                                                                                                                               | 0.18 |
| 257634_s_at | At3g26170<br>At3g26180 | CYP71B19__cytochrome P450, family 71, subfamily B, polypeptide 19                                                                                                                                              | 0.18 |
| 254833_s_at | At4g12280<br>At4g12290 | copper amine oxidase family protein                                                                                                                                                                            | 0.18 |
| 253779_at   | At4g28490              | HAE_RLK5__Leucine-rich receptor-like protein kinase family protein                                                                                                                                             | 0.18 |
| 249797_at   | At5g23750              | Remorin family protein                                                                                                                                                                                         | 0.18 |
| 262626_at   | At1g06430              | FTSH8__FTSH protease 8                                                                                                                                                                                         | 0.17 |
| 259943_at   | At1g71480              | Nuclear transport factor 2 (NTF2) family protein                                                                                                                                                               | 0.17 |
| 260774_at   | At1g78290              | SNRK2-8_SNRK2.8_SRK2C__Protein kinase superfamily protein                                                                                                                                                      | 0.17 |
| 257222_at   | At3g27925              | Deg1_DEGP1__DegP protease 1                                                                                                                                                                                    | 0.17 |

|             |                        |                                                                                                                                                                                                                                                                        |      |
|-------------|------------------------|------------------------------------------------------------------------------------------------------------------------------------------------------------------------------------------------------------------------------------------------------------------------|------|
| 252648_at   | At3g44630              | Disease resistance protein (TIR-NBS-LRR class) family                                                                                                                                                                                                                  | 0.17 |
| 246335_at   | At3g44880              | ACD1_LLS1_PAO__Pheophorbide a oxygenase family protein with Rieske [2Fe-2S] domain                                                                                                                                                                                     | 0.17 |
| 252485_at   | At3g46530              | RPP13__NB-ARC domain-containing disease resistance protein                                                                                                                                                                                                             | 0.17 |
| 252462_at   | At3g47250              | Plant protein of unknown function (DUF247)                                                                                                                                                                                                                             | 0.17 |
| 254764_at   | At4g13250              | NYC1__NAD(P)-binding Rossmann-fold superfamily protein                                                                                                                                                                                                                 | 0.17 |
| 253358_at   | At4g32940              | GAMMA-VPE_GAMMAVPE__gamma vacuolar processing enzyme                                                                                                                                                                                                                   | 0.17 |
| 249754_at   | At5g24530              | DMR6__2-oxoglutarate (2OG) and Fe(II)-dependent oxygenase superfamily protein                                                                                                                                                                                          | 0.17 |
| 247356_at   | At5g63800              | BGAL6_MUM2__Glycosyl hydrolase family 35 protein                                                                                                                                                                                                                       | 0.17 |
| 261077_at   | At1g07430              | HAI2__highly ABA-induced PP2C gene 2                                                                                                                                                                                                                                   | 0.16 |
| 259661_at   | At1g55265              | Protein of unknown function, DUF538                                                                                                                                                                                                                                    | 0.16 |
| 262875_at   | At1g64970              | G-TMT_TMT1_VTE4__gamma-tocopherol methyltransferase                                                                                                                                                                                                                    | 0.16 |
| 261120_at   | At1g75410              | BLH3__BEL1-like homeodomain 3                                                                                                                                                                                                                                          | 0.16 |
| 267336_at   | At2g19310              | HSP20-like chaperones superfamily protein                                                                                                                                                                                                                              | 0.16 |
| 266673_at   | At2g29630              | PY_THIC__thiaminC                                                                                                                                                                                                                                                      | 0.16 |
| 263478_at   | At2g31880              | EVR_SOBR1__Leucine-rich repeat protein kinase family protein                                                                                                                                                                                                           | 0.16 |
| 263956_at   | At2g35940              | BLH1_EDA29__BEL1-like homeodomain 1                                                                                                                                                                                                                                    | 0.16 |
| 258223_at   | At3g15840              | PIFI__post-illumination chlorophyll fluorescence increase                                                                                                                                                                                                              | 0.16 |
| 258181_at   | At3g21670              | Major facilitator superfamily protein                                                                                                                                                                                                                                  | 0.16 |
| 256766_at   | At3g22231              | PCC1__pathogen and circadian controlled 1                                                                                                                                                                                                                              | 0.16 |
| 256754_at   | At3g25690              | AtCHUP1_CHUP1__Hydroxyproline-rich glycoprotein family protein                                                                                                                                                                                                         | 0.16 |
| 257611_at   | At3g26580              | Tetratricopeptide repeat (TPR)-like superfamily protein                                                                                                                                                                                                                | 0.16 |
| 251218_at   | At3g62410              | CP12-2__CP12 domain-containing protein 2                                                                                                                                                                                                                               | 0.16 |
| 251221_at   | At3g62550              | Adenine nucleotide alpha hydrolases-like superfamily protein                                                                                                                                                                                                           | 0.16 |
| 254551_at   | At4g19840              | ATPP2-A1_ATPP2A-1_PP2-A1__phloem protein 2-A1                                                                                                                                                                                                                          | 0.16 |
| 247304_at   | At5g63850              | AAP4__amino acid permease 4                                                                                                                                                                                                                                            | 0.16 |
| 247025_at   | At5g67030              | ABA1_ATABA1_ATZEP_IBS3_LOS6_NPQ2_ZEP__zeaxanthin epoxidase (ZEP) (ABA1)                                                                                                                                                                                                | 0.16 |
| 261569_at   | At1g01060              | LHY_LHY1__Homeodomain-like superfamily protein                                                                                                                                                                                                                         | 0.15 |
| 261581_at   | At1g01140              | CIPK9_PKS6_SnRK3.12__CBL-interacting protein kinase 9                                                                                                                                                                                                                  | 0.15 |
| 261084_at   | At1g07440              | NAD(P)-binding Rossmann-fold superfamily protein                                                                                                                                                                                                                       | 0.15 |
| 255957_at   | At1g22160              | Protein of unknown function (DUF581)                                                                                                                                                                                                                                   | 0.15 |
| 262916_at   | At1g59700              | ATGSTU16_GSTU16__glutathione S-transferase TAU 16                                                                                                                                                                                                                      | 0.15 |
| 260012_at   | At1g67865              | unknown protein; BEST Arabidopsis thaliana protein match is: unknown protein (TAIR:AT1G67860.1); Has 13 Blast hits to 13 proteins in 2 species: Archae - 0; Bacteria - 0; Metazoa - 0; Fungi - 0; Plants - 13; Viruses - 0; Other Eukaryotes - 0 (source: NCBI BLink). | 0.15 |
| 267115_s_at | At2g32530<br>At2g32540 | ATCSLB03_ATCSLB3_CSLB03__cellulose synthase-like B3                                                                                                                                                                                                                    | 0.15 |
| 256997_at   | At3g14067              | Subtilase family protein                                                                                                                                                                                                                                               | 0.15 |
| 257965_at   | At3g19900              | unknown protein; FUNCTIONS IN: molecular_function unknown; INVOLVED IN: biological_process unknown; LOCATED IN: chloroplast; EXPRESSED IN: 23 plant structures; EXPRESSED DURING: 13 growth stages; CONTAINS InterPro                                                  | 0.15 |

DOMAIN/s: Protein of unknown function DUF3067 (InterPro:IPR021420); Has 276 Blast hits to 276 proteins in 83 species: Archae - 0; Bacteria - 112; Metazoa - 0; Fungi - 2; Plants - 59; Viruses - 0; Other Eukaryotes - 103 (source: NCBI BLink).

|           |           |                                                     |      |
|-----------|-----------|-----------------------------------------------------|------|
| 251272_at | At3g61890 | ATHB-12_ATHB12_HB-12__homeobox 12                   | 0.15 |
| 255127_at | At4g08300 | nodulin MtN21 /EamA-like transporter family protein | 0.15 |
| 254998_at | At4g09760 | Protein kinase superfamily protein                  | 0.15 |
| 255016_at | At4g10120 | ATSPS4F__Sucrose-phosphate synthase family protein  | 0.15 |
| 254573_at | At4g19420 | Pectinacetylerase family protein                    | 0.15 |
| 248333_at | At5g52390 | PAR1 protein                                        | 0.15 |

---

Targets: senescent leaves, cauline leaves, petals and sepals. Base: all tissues. Limit: 100 genes.

Rows with genes of interest are shaded in grey.

<sup>a</sup> Gene annotation was performed using the online tool [http://www.bar.utoronto.ca/ntools/cgi-bin/ntools\\_agi\\_converter.cgi](http://www.bar.utoronto.ca/ntools/cgi-bin/ntools_agi_converter.cgi).

<sup>b</sup> For information about the calculation of the expression score K, see <https://www.genevestigator.com/userdocs/manual/biomarker.html>.



**Supplemental Table 2.** List of Primers Used in this Study.

| GENE / MUTANT                                                       | PRIMER NAME                 | SEQUENCE (5'→3')                     |
|---------------------------------------------------------------------|-----------------------------|--------------------------------------|
| <i>T-DNA confirmation</i>                                           |                             |                                      |
| <i>mes16-1</i>                                                      | MES16-1-RP                  | GTTGAAGAAAAGAAACCGCAC                |
|                                                                     | MES16-1-LP                  | CTGAGCCCGTAATTCACITTTG               |
| <i>cyp89a9-1</i>                                                    | CYP89A9-1-RP                | TACGACAAATAAGCCCAATGG                |
|                                                                     | CYP89A9-1-LP                | GCTCTGATGTGTTTCGGAGAG                |
| <i>cyp89a9-2</i>                                                    | CYP89A9-2-RP                | CTCACGATCTCCGAGTCACTC                |
|                                                                     | CYP89A9-2-LP                | GCGTGGACCAAATAAACAAG                 |
| <i>cyp71b19-1</i>                                                   | CYP71B19-1-RP               | ATCGATGATGTCTTCGTGCTC                |
|                                                                     | CYP71B19-1-LP               | CCACTAGACCATTGGCTTTTTTC              |
| <i>cyp71b19-2</i>                                                   | CYP71B19-2-RP               | CCTCTCGGATATGCCTAAAGG                |
|                                                                     | CYP71B19-2-LP               | CCAACTTTCTCTTCCCGAATC                |
| SALK T-DNA                                                          | LBb1.3                      | ATTTTGCCGATTTCCGGAAC                 |
| SAIL T-DNA                                                          | LB2                         | GCTTCCTATTATATCTTCCCAAATTACCAATACA   |
| JIC SM T-DNA                                                        | Spm32                       | TACGAATAAGAGCG CCATTTTAGAGTGA        |
| JIC GT T-DNA                                                        | Ds3-1                       | ACCCGACCGGATCGTATCGGT                |
| <i>RT-PCR</i>                                                       |                             |                                      |
| <i>CYP89A9</i>                                                      | CYP89A9_FL_S                | TCGGAAACATCATCTGGCTTAA               |
|                                                                     | CYP89A9_FL_AS               | GCTTTGAAAGGGTTTTTCATGACC             |
| <i>CYP71B19</i>                                                     | CYP71B19_FL_S               | TCTCATCACCTTCGTTTCGT                 |
|                                                                     | CYP71B19_FL_AS              | TCTTTATGTGTCATCCCATCAG               |
| <i>ACT2</i>                                                         | ACT2-S                      | TGGAATCCACGAGACAACCTA                |
|                                                                     | ACT2-AS                     | TTCTGTGAACGATTCTGGAC                 |
| <i>Cloning of CYP89A9-GFP</i>                                       |                             |                                      |
| <i>CYP89A9</i>                                                      | CYP89A9- <i>Xma</i> I-S     | TCCCCCGGGATGGAGATCACCCTATC           |
|                                                                     | CYP89A9- <i>Nhe</i> I-AS    | CTAGCTAGCCTTTCTCCTTGGATAAATATTTGC    |
| <i>Cloning of CYP89A9 and ATR-1 in pFastbac1 and pFastbac DUAL</i>  |                             |                                      |
| <i>CYP89A9</i>                                                      | CYP89A9- <i>Eco</i> RI-S    | CCGGAATTCATGGAGATCACCCTATCAT         |
|                                                                     | CYP89A9- <i>Eco</i> RI-AS   | CCGGAATTCCTACTTTCTCCTTGGATAAA        |
| <i>CYP89A9</i>                                                      | CYP89A9- <i>Kpn</i> I-S     | CGGGGTACCATGGAGATCACCCTATCATATTCC    |
|                                                                     | CYP89A9- <i>Kpn</i> I-AS    | GCAAATATTTATCCAAGGAGAAAGTGAGGTACCCCG |
| <i>ATR-1</i>                                                        | ATR-1- <i>Eco</i> RI-S      | CCGGAATTCATGACTTCTGCTTTGTATGC        |
|                                                                     | ATR-1- <i>Eco</i> RI-AS     | CCGGAATTCtCACCAGACATCTCTGAG          |
| <i>Complementation of cyp89a9-1, cyp89a9-2 and mes16-1cyp89a9-1</i> |                             |                                      |
| <i>CYP89A9</i>                                                      | CYP89A9- <i>Eco</i> RI-S    | CCGGAATTCATGGAGATCACCCTATCAT         |
|                                                                     | CYP89A9- <i>Hind</i> III-AS | CCCAAGCTTTCCTTTCTCCTTGGATAAAT        |
